# Supplementary material
Source: Springer Nature journal article supplement (https://www.springermedizin.de/resource/supplementary/13063_2010_644_MOESM1_ESM.pdf/9618386)
Supplement: MOESM1 [file 9618386]

Assessment: inclusion criteria by oncologist in charge or delegated nursing staff

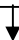

Name / telephone number of patient forwarded to person responsible for trial after written consent has been received. Assessment of inclusion criteria as well as provision of information on trial by person in charge of trial

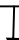

If inclusion criteria are met:

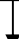

Provision of oral and written patient information/Informed consent

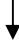

Baseline Assessment / written survey

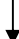

Stratification: diagnosis, randomisation into:

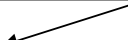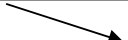

Intervention group

Control group

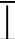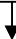

Written survey of patients: months 3, 6, 12
